# Supplementary material
Source: PubMed Central journal article supplement (PMC3194886)
Supplement: supp_77_20_7195__1.pdf [file supp_77_20_7195__1.pdf]

## Supporting Material

**Table S1.** List of sequences used in multi-locus gene sequence assembly using unassembled Illumina sequenced fragments.

| <b>Strain</b> | <b>Locus</b> | <b>NCBI GI No. or Accession No.</b> |
|---------------|--------------|-------------------------------------|
| 1F_211        | atpA         | 157285228                           |
| 1F_230        | atpA         | 157285228                           |
| FF_85         | atpA         | 157285228                           |
| FF_167        | atpA         | 157285118                           |
| FF_93         | atpA         | 157285118                           |
| FS_144        | atpA         | 157285118                           |
| FS_238        | atpA         | 157285118                           |
| 1S_45         | atpA         | 157285224                           |
| FF_238        | atpA         | 157285022                           |
| 5S_168        | atpA         | 157285018                           |
| ZF_211        | atpA         | 157285172                           |
| 1C10          | atpA         | 208659521                           |
| FF_50         | atpA         | 208659521                           |
| ZF_29         | atpA         | 208659521                           |
| ZF_55         | atpA         | 208659521                           |
| 9CS118        | atpA         | 157285082                           |
| 9ZB36         | atpA         | 157285082                           |
| 9ZD137        | atpA         | 157285082                           |
| ZF_129        | atpA         | 157285082                           |
| 0407CG136     | atpA         | 157285212                           |
| 0407ZB19      | atpA         | 157285212                           |
| 0407ZC148     | atpA         | 157285212                           |
| ZS_139        | atpA         | 157285212                           |
| ZS_61         | atpA         | 157285212                           |
| 9CS106        | atpA         | 157285174                           |
| 9ZC13         | atpA         | 157285174                           |
| 9ZC40         | atpA         | 157285174                           |
| 9ZC77         | atpA         | 157285174                           |
| ZF_91         | atpA         | 157285174                           |
| 5S_149        | atpA         | 157285180                           |
| 1F_155        | atpA         | 179184105                           |
| 1F_187        | atpA         | 179184105                           |
| FF_500        | atpA         | 179184105                           |
| ZS_17         | atpA         | 179184105                           |
| 1F_157        | atpA         | 157285054                           |
| 1S_206        | atpA         | 157285054                           |
| FF_6          | atpA         | 157285054                           |
| ZF_90         | atpA         | 157285054                           |
| 1S_124        | atpA         | 157285054                           |
| 1S_130        | atpA         | 157285054                           |
| FF_238        | gyrB         | 56409827                            |

|           |      |           |
|-----------|------|-----------|
| 9CS118    | gyrB | GU379148  |
| 9ZB36     | gyrB | GU379148  |
| 9ZD137    | gyrB | GU379148  |
| ZF_129    | gyrB | GU379148  |
| 0407CG136 | gyrB | GU378456  |
| 0407ZB19  | gyrB | GU378456  |
| 0407ZC148 | gyrB | GU378456  |
| ZS_139    | gyrB | GU378456  |
| 9ZC13     | gyrB | GU378470  |
| 9ZC40     | gyrB | GU378470  |
| 9ZC77     | gyrB | GU378470  |
| 5S_149    | gyrB | 82940537  |
| 1F_155    | gyrB | 82940539  |
| 1F_187    | gyrB | 82940539  |
| 5F_79     | gyrB | 82940539  |
| FF_500    | gyrB | 82940539  |
| ZS_17     | gyrB | 82940539  |
| 1S_206    | gyrB | GU378459  |
| 1S_206    | gyrB | GU378468  |
| ZF_90     | gyrB | 33186728  |
| 1S_124    | gyrB | 33186728  |
| 1S_130    | gyrB | 33186728  |
| 0407CG136 | pryH | 195927663 |
| 0407ZB19  | pryH | 195927663 |
| 0407ZC148 | pryH | 195927663 |
| ZS_139    | pryH | 195927663 |
| ZS_61     | pryH | 195927663 |
| 5S_168    | pyrH | 156251952 |
| ZF_211    | pyrH | 164608665 |
| 1C10      | pyrH | 195982676 |
| FF_50     | pyrH | 195982676 |
| ZF_29     | pyrH | 195982676 |
| ZF_55     | pyrH | 195982676 |
| 9CS106    | pyrH | 195927655 |
| 9ZC13     | pyrH | 195927655 |
| 9ZC40     | pyrH | 195927655 |
| 9ZC77     | pyrH | 195927655 |
| ZF_91     | pyrH | 195927655 |
| 1F_155    | pyrH | 195927657 |
| 1F_187    | pyrH | 195927657 |
| FF_500    | pyrH | 195927657 |
| ZS_17     | pyrH | 195927657 |
| 1F_157    | pyrH | 195927663 |
| 1S_206    | pyrH | 195927663 |
| FF_6      | pyrH | 195927663 |
| ZF_90     | pyrH | 195927663 |
| 1S_124    | pyrH | 195927663 |

|           |      |           |
|-----------|------|-----------|
| 1S_130    | pyrH | 195927663 |
| FF_162    | recA | 223635952 |
| FF_33     | recA | 223635952 |
| FF_454    | recA | 223635952 |
| 1F_211    | recA | 58415330  |
| 1F_230    | recA | 58415330  |
| FF_85     | recA | 58415330  |
| FF_238    | recA | 157100332 |
| 5S_168    | recA | GU380042  |
| ZF_211    | recA | GU380214  |
| 9CS118    | recA | GU380087  |
| 9ZB36     | recA | GU380087  |
| 9ZD137    | recA | GU380087  |
| ZF_129    | recA | GU380087  |
| 0407CG136 | recA | GU378551  |
| 0407ZB19  | recA | GU378551  |
| 0407ZC148 | recA | GU378551  |
| ZS_61     | recA | GU378551  |
| 9ZC13     | recA | GU378553  |
| 9ZC40     | recA | GU378553  |
| ZF_91     | recA | GU378553  |
| 1F_155    | recA | 58415533  |
| 1F_187    | recA | 58415533  |
| FF_500    | recA | 58415533  |
| ZS_17     | recA | 58415533  |
| 1S_206    | recA | 58415653  |
| FF_6      | recA | 58415653  |
| ZF_90     | recA | 58415653  |
| 1S_124    | recA | 58415653  |
| 1S_130    | recA | 58415653  |
| FF_162    | topA | 117956862 |
| FF_33     | topA | 117956862 |
| FF_454    | topA | 117956862 |
| 1F_211    | topA | 133754885 |
| 1F_230    | topA | 133754885 |
| FF_85     | topA | 133754885 |
| FF_167    | topA | 117956926 |
| FF_93     | topA | 117956926 |
| FS_144    | topA | 117956926 |
| FS_238    | topA | 117956926 |
| 1S_45     | topA | 117956946 |
| FF_238    | topA | 117956852 |
| 5S_168    | topA | 117956902 |
| ZF_211    | topA | 117956878 |
| 9CS118    | topA | 94482744  |
| 9ZB36     | topA | 94482744  |
| 9ZD137    | topA | 94482744  |

|           |      |           |
|-----------|------|-----------|
| ZF_129    | topA | 94482744  |
| 0407CG136 | topA | 94482744  |
| 0407ZB19  | topA | 94482744  |
| 0407ZC148 | topA | 94482744  |
| ZS_139    | topA | 94482744  |
| ZS_61     | topA | 94482744  |
| 9CS106    | topA | 94482728  |
| 9ZC13     | topA | 94482728  |
| 9ZC40     | topA | 94482728  |
| 9ZC77     | topA | 94482728  |
| ZF_91     | topA | 94482728  |
| 5S_149    | topA | 94482736  |
| 1F_155    | topA | 118577652 |
| 1F_187    | topA | 118577652 |
| FF_500    | topA | 118577652 |
| ZS_17     | topA | 118577652 |
| 1F_157    | topA | 94482744  |
| 1S_206    | topA | 94482744  |
| FF_6      | topA | 94482744  |
| ZF_90     | topA | 94482744  |
| 1S_124    | topA | 94482744  |
| 1S_130    | topA | 94482744  |

---

**Table S2.** NCBI GI numbers for *V. breoganii* sequences used in this analysis, which were not included in previously published *Vibrio* taxonomic analysis.

| NCBI GI No. | Strain Name | Gene |
|-------------|-------------|------|
| 179183868   | CECT 7222   | atpA |
| 179183905   | LMG 24484   | atpA |
| 179183937   | C 5.5       | atpA |
| 179184888   | CECT 7222   | recA |
| 179185171   | C 5.5       | recA |
| 179185203   | LMG 24484   | recA |
| 195982676   | RD 15.11    | pyrH |
| 195982678   | CMJ 13.7    | pyrH |
| 195982680   | VB 16.3     | pyrH |
| 195982682   | C 5.5       | pyrH |
| 195982684   | RD2 G5      | pyrH |
| 208659519   | C 4.15      | atpA |
| 208659521   | CMJ 13.7    | atpA |
| 208659523   | RD2B2       | atpA |
| 208659525   | VB 16.3     | atpA |
| 208659527   | C 4.15      | recA |
| 208659529   | CMJ 13.7    | recA |
| 208659531   | RD2B2       | recA |
| 208659533   | VB 16.3     | recA |

**Table S3.** Pairwise P values from UniFrac analysis.

|               | Fract-2006 | Invert-2007 | Particle-2007 |
|---------------|------------|-------------|---------------|
| Fract-2006    |            | 0.43        | 0.73          |
| Invert-2007   |            |             | 0.34          |
| Particle-2007 |            |             |               |
